8  
9  
10  
11  
12  
13  
14  
15  
16  
17  
18  
19  
20  
21  
22  
23  
24  
25  
26  
27

## Abstract

**Summary:** AlphaFamImpute is an imputation package for calling, phasing, and imputing genome-wide genotypes in outbred full-sib families from single nucleotide polymorphism (SNP) array and genotype-by-sequencing (GBS) data. GBS data is increasingly being used to genotype individuals, especially when SNP arrays do not exist for a population of interest. Low-coverage GBS produces data with a large number of missing or incorrect naïve genotype calls, which can be improved by identifying shared haplotype segments between full-sib individuals. Here we present AlphaFamImpute, an algorithm specifically designed to exploit the genetic structure of full-sib families. It performs imputation using a two-step approach. In the first step it phases and imputes parental genotypes based on the segregation states of their offspring (that is, which pair of parental haplotypes the offspring inherited). In the second step it phases and imputes the offspring genotypes by detecting which haplotype segments the offspring inherited from their parents. With a series of simulations we find that AlphaFamImpute obtains high accuracy genotypes, even when the parents are not genotyped and individuals are sequenced at less than 1x coverage.

**Availability and implementation:** AlphaFamImpute is available as a Python package from the AlphaGenes website, <http://www.AlphaGenes.roslin.ed.ac.uk/AlphaFamImpute>.

**Contact:** [awhalen@roslin.ed.ac.uk](mailto:awhalen@roslin.ed.ac.uk)

**Supplementary information:** A complete description of the methods is available in the supplementary information.

## 28 **Introduction**

29       AlphaFamImpute is a software package for calling, phasing, and imputing genome-wide  
30 genotypes in full-sib families when individuals are genotyped with single nucleotide  
31 polymorphism (SNP) array or genotyping-by-sequencing (GBS) data. Many applications in  
32 genetics and breeding rely on the availability of low-cost high-accuracy genotypes. GBS is an  
33 alternative to SNP arrays (Baird et al., 2008; Davey et al., 2011; Elshire et al., 2011), where specific  
34 restriction enzymes are used to focus sequencing resources on a limited number of cut sites. GBS  
35 is particularly attractive for species without an existing SNP array or as a low-cost alternative to  
36 SNP arrays (e.g., Gorjanc et al., 2015, 2017).

37       GBS data, and in particular low-coverage GBS data, suffers from a large proportion of  
38 missing or, when naively called, incorrect genotypes. Unlike SNP array data, where genotypes are  
39 called directly from the genotyping platform, with GBS data genotypes must be called from  
40 observed sequence reads. It is challenging to accurately call an individual's genotype when no  
41 reads or a small number of reads are generated at a particular locus. Genotype calling accuracy can  
42 be increased by considering the haplotypes of other individuals in the population and detecting  
43 shared haplotype segments between individuals (Davies et al., 2016; Gorjanc et al., 2017).

44       Some existing software packages can be used for genotype calling and imputation from  
45 GBS data, for example, *Beagle* (Browning and Browning, 2009), *STITCH* (Davies et al., 2016),  
46 *AlphaPeel* (Whalen et al., 2018) or *magicimpute* (Zheng et al., 2018). However, these software  
47 packages are not designed to exploit the pattern of haplotype sharing observed in large full-sib  
48 families. As with traditional imputation methods (e.g., Antolín et al., 2017; O'Connell et al., 2014),  
49 we expect that the accuracy of genotype calling, phasing, and imputation from GBS data is highest  
50 when population structure is taken into account. In the context of an outbred full-sib family,

51 imputation can be simplified by recognizing that we only need to consider the four parental  
52 haplotypes and identify of which pair of haplotypes the offspring inherited at each locus. Here we  
53 describe our software package AlphaFamImpute that leverages this particular population structure  
54 to improve the accuracy of calling, phasing and imputing genome-wide genotypes and which  
55 decreases run-time compared to existing methods. We focus on outbred full-sib families because  
56 this represents a population structure commonly found in research populations, and in animal and  
57 plant breeding programs.

## 58 **Method**

59 AlphaFamImpute performs imputation using a two-step approach. In the first step we call,  
60 phase and impute parental genotypes based on the segregation states of their offspring. Segregation  
61 states indicate which pair of parental haplotypes an individual inherits at each locus (Ferdosi et al.,  
62 2014). We carry out this step iteratively. At each locus, we use the segregation states to project the  
63 offspring data to the corresponding parental haplotypes. We combine these parental haplotype  
64 estimates with the parents' data to call parental genotypes at the locus. We then update the  
65 offspring segregation states based on the called parental genotypes. Unlike *magicimpute* (Zheng  
66 et al., 2018) or *hsphase* (Ferdosi et al., 2014), we treat the offspring genotype and segregation  
67 states probabilistically to account for uncertainty in the genetic data and the called parental  
68 haplotypes. In the second step we call, phase, and impute the offspring genotypes by detecting  
69 which haplotype segments the offspring inherit from their parents. This process is carried out using  
70 multi-locus iterative peeling (Whalen et al., 2018). For a detailed description of the approach, see  
71 the Supplementary Information.

72 Our two-step approach builds closely on previous research. It can be interpreted as: (i) a  
73 sampling scheme for the multi-locus iterative peeling (Meuwissen and Goddard, 2010; Whalen et

74 al., 2018); (ii) a probabilistic extension of *hsphase* for full-sib GBS data (Ferdosi et al., 2014); or  
75 (iii) an adaptation of *magicimpute* to specifically handle low-coverage GBS data with outbred full-  
76 sib individuals (Zheng et al., 2018).

## 77 **Software**

78 AlphaFamImpute is written in Python 3 using the *numpy* (Walt et al., 2011) and *numba*  
79 (Lam et al., 2015) libraries. It runs on Windows, Linux, and Mac. As inputs, AlphaFamImpute  
80 takes in: (i) a genotype file or a sequence read count file, which respectively give the ordered  
81 genotypes or sequence read counts for each individual; (ii) a pedigree file which splits the  
82 population into full-sib families; and (iii) an optional map file which allows AlphaFamImpute to  
83 be run on multiple chromosomes simultaneously. AlphaFamImpute outputs either called  
84 genotypes or genotype dosages.

## 85 **Example**

86 We demonstrate the performance of AlphaFamImpute on a series of simulated datasets.  
87 Each dataset consisted of 100 full-sib families with outbred parents and either 4, 8, 20, 30, 50, or  
88 100 offspring per family. We generated parental haplotypes for 200 parents on a single 100 cM  
89 chromosome with 1,000 loci using MaCS (Chen et al., 2009) with an ancestral genetic history set  
90 to mimic cattle (Villa-Angulo et al., 2009). We then dropped the haplotypes through the pedigree  
91 of full-sib families using AlphaSimR (Gaynor et al., 2019). We generated GBS data by assuming  
92 the number of reads at each locus of an individual followed a Poisson distribution with mean equal  
93 to a coverage level of 0.5x, 1x, 2x, and 5x and that there was an 0.1% sequencing error rate. The  
94 parents either had no GBS data, had low-coverage GBS data at the same coverage as offspring, or  
95 had high-coverage (25x) GBS data. We measured imputation accuracy as the correlation between

96 an individual's true genotype and their imputed genotype dosage averaged across 10 replicates of  
97 100 full-sib families.

98 Figure 1 presents imputation accuracy across all of the simulations. Imputation accuracy  
99 increased with higher GBS coverage, a larger number of genotyped offspring, and more  
100 information on the parents. Imputation accuracy was high in a range of cases: if the parents were  
101 sequenced at high-coverage imputation accuracy was 0.995 with 15 offspring sequenced at 1x; if  
102 the parents were sequenced at the same coverage as the offspring, imputation accuracy was 0.990  
103 with 10 offspring sequenced at 2x; and if the parents had no data, imputation accuracy was 0.997  
104 with 20 offspring sequenced at 2x.

105 The primary factor determining imputation accuracy was the total sequencing resources  
106 spent on a family. Low sequencing coverage on the parents could be compensated by sequencing  
107 additional offspring or sequencing those offspring at higher coverage. When only a few offspring  
108 were available this could be compensated by sequencing those offspring at higher coverage.

109 The computational requirements of AlphaFamImpute were low. When imputing 100 full-  
110 sib families with 100 offspring each (total 200 parents and 10,000 offspring) imputation took 106  
111 seconds and used 308 megabytes of memory for 1,000 loci on one chromosome.

## 112 **Conclusion**

113 In this paper, we have described the AlphaFamImpute software package for performing  
114 fast, high-accuracy calling, phasing and imputing genome-wide genotypes in full-sib families from  
115 GBS data. This program will improve the quality of genome-wide genotypes from low-coverage  
116 GBS in a range of research and breeding applications.

## 117 **Funding and Acknowledgements**

118 The authors acknowledge the financial support from the BBSRC ISPG to The Roslin Institute  
119 BB/J004235/1, from Genus PLC, and from Grant Nos. BB/M009254/1, BB/L020726/1,  
120 BB/N004736/1, BB/N004728/1, BB/L020467/1, BB/N006178/1 and Medical Research Council  
121 (MRC) Grant No. MR/M000370/1.

122 This work has made use of the resources provided by the Edinburgh Compute and Data Facility  
123 (ECDF) (<http://www.ecdf.ed.ac.uk>).

#### 124 **Competing interests**

125 The authors declare no competing interests.

#### 126 **References**

127 Antolín, R., Nettelblad, C., Gorjanc, G., Money, D., and Hickey, J.M. (2017). A hybrid  
128 method for the imputation of genomic data in livestock populations. *Genet. Sel. Evol.* *49*, 30.

129 Baird, N.A., Etter, P.D., Atwood, T.S., Currey, M.C., Shiver, A.L., Lewis, Z.A., Selker,  
130 E.U., Cresko, W.A., and Johnson, E.A. (2008). Rapid SNP discovery and genetic mapping using  
131 sequenced RAD markers. *PLoS ONE* *3*, e3376.

132 Browning, B.L., and Browning, S.R. (2009). A Unified Approach to Genotype  
133 Imputation and Haplotype-Phase Inference for Large Data Sets of Trios and Unrelated  
134 Individuals. *Am. J. Hum. Genet.* *84*, 210–223.

135 Chen, G.K., Marjoram, P., and Wall, J.D. (2009). Fast and flexible simulation of DNA  
136 sequence data. *Genome Res.* *19*, 136–142.

137 Davey, J.W., Hohenlohe, P.A., Etter, P.D., Boone, J.Q., Catchen, J.M., and Blaxter, M.L.  
138 (2011). Genome-wide genetic marker discovery and genotyping using next-generation  
139 sequencing. *Nat. Rev. Genet.* *12*, 499–510.

140 Davies, R.W., Flint, J., Myers, S., and Mott, R. (2016). Rapid genotype imputation from  
141 sequence without reference panels. *Nat. Genet. advance online publication.*

142 Elshire, R.J., Glaubitz, J.C., Sun, Q., Poland, J.A., Kawamoto, K., Buckler, E.S., and  
143 Mitchell, S.E. (2011). A robust, simple genotyping-by-sequencing (GBS) approach for high  
144 diversity species. *PLoS One* 6, e19379.

145 Ferdosi, M.H., Kinghorn, B.P., Werf, J.H.J. van der, and Gondro, C. (2014). Detection of  
146 recombination events, haplotype reconstruction and imputation of sires using half-sib SNP  
147 genotypes. *Genet. Sel. Evol.* 46, 1–15.

148 Gaynor, R.C., Gorjanc, G., Wilson, D.L., Money, D., and Hickey, J.M. (2019).  
149 AlphaSimR: An R Package for Breeding Program Simulations. *Manuscr. Prep.*

150 Gorjanc, G., Cleveland, M.A., Houston, R.D., and Hickey, J.M. (2015). Potential of  
151 genotyping-by-sequencing for genomic selection in livestock populations. *Genet. Sel. Evol.* 47,  
152 12.

153 Gorjanc, G., Dumasy, J.-F., Gonen, S., Gaynor, R.C., Antolin, R., and Hickey, J.M.  
154 (2017). Potential of Low-Coverage Genotyping-by-Sequencing and Imputation for Cost-  
155 Effective Genomic Selection in Biparental Segregating Populations. *Crop Sci.* 57, 1404–1420.

156 Lam, S.K., Pitrou, A., and Seibert, S. (2015). Numba: A LLVM-based Python JIT  
157 Compiler. In *Proceedings of the Second Workshop on the LLVM Compiler Infrastructure in  
158 HPC*, (New York, NY, USA: ACM), pp. 7:1–7:6.



159           Meuwissen, T., and Goddard, M. (2010). The Use of Family Relationships and Linkage  
160   Disequilibrium to Impute Phase and Missing Genotypes in Up to Whole-Genome Sequence  
161   Density Genotypic Data. *Genetics* *185*, 1441–1449.

162           O’Connell, J., Gurdasani, D., Delaneau, O., Pirastu, N., Ulivi, S., Cocca, M., Traglia, M.,  
163   Huang, J., Huffman, J.E., and Rudan, I. (2014). A general approach for haplotype phasing across  
164   the full spectrum of relatedness. *PLoS Genet.* *10*, e1004234.

165           Villa-Angulo, R., Matukumalli, L.K., Gill, C.A., Choi, J., Tassell, C.P.V., and  
166   Grefenstette, J.J. (2009). High-resolution haplotype block structure in the cattle genome. *BMC*  
167   *Genet.* *10*, 19.

168           Walt, S. van der, Colbert, S.C., and Varoquaux, G. (2011). The NumPy Array: A  
169   Structure for Efficient Numerical Computation. *Comput. Sci. Eng.* *13*, 22–30.

170           Whalen, A., Ros-Freixedes, R., Wilson, D.L., Gorjanc, G., and Hickey, J.M. (2018).  
171   Hybrid peeling for fast and accurate calling, phasing, and imputation with sequence data of any  
172   coverage in pedigrees. *Genet. Sel. Evol.* *50*, 67.

173           Zheng, C., Boer, M.P., and van Eeuwijk, F.A. (2018). Accurate Genotype Imputation in  
174   Multiparental Populations from Low-Coverage Sequence. *Genetics* *210*, 71.

175

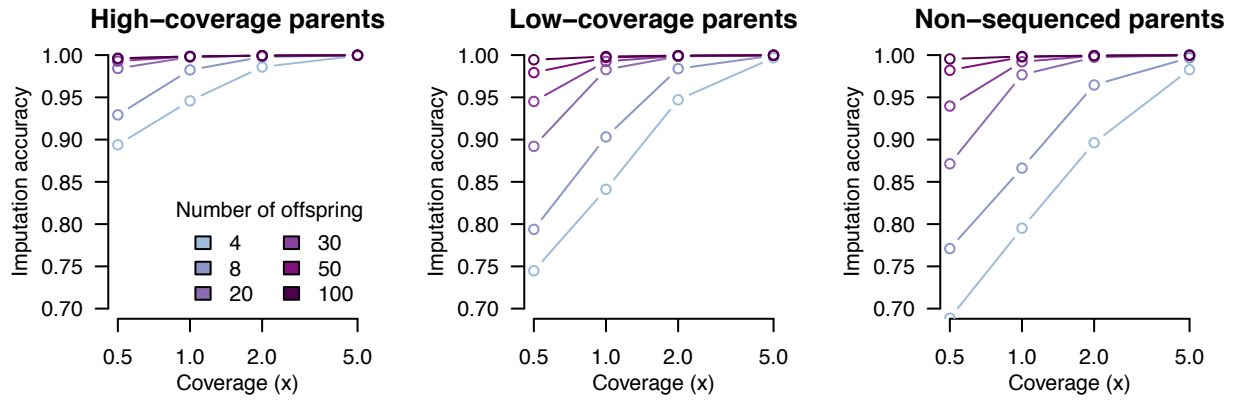

176

177 Figure 1. Imputation accuracy for full-sib offspring as a function of sequencing coverage,

178 number of offspring, and parent sequencing coverage.
